# Supplementary material for: Dissociable effects of the prodrug phendimetrazine and its metabolite phenmetrazine at dopamine transporters
Source: PubMed Central journal article supplement (PMC4981850; doi:10.1038/srep31385), 2016-08-12
Supplement: srep31385-s1.pdf [file srep31385-s1.pdf]

## **Supplemental Materials**

### **Dissociable effects of the prodrug phendimetrazine and its metabolite phenmetrazine at dopamine transporters**

Ernesto Solis Jr<sup>1</sup>, Julie A Suyama<sup>2</sup>, Matthew F Lazenka<sup>2</sup>, Louis J De Felice<sup>1</sup>, S Stevens Negus<sup>2,3</sup>,  
Bruce E Blough<sup>4</sup>, Matthew L Banks<sup>2,3\*</sup>

<sup>1</sup>Department of Physiology and Biophysics, Virginia Commonwealth University, Richmond, VA, USA 23298

<sup>2</sup>Department of Pharmacology and Toxicology, Virginia Commonwealth University, Richmond, VA, USA 23298

<sup>3</sup>Institute for Drug and Alcohol Studies, Virginia Commonwealth University, Richmond, VA, USA 23298

<sup>4</sup>Center for Drug Discovery, Research Triangle Institute, Research Triangle Park, NC, USA 27709

**Number of Figures: 4**

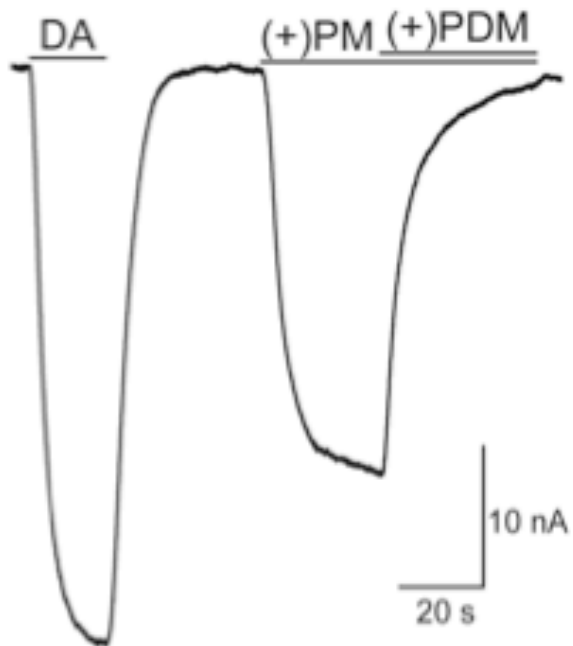

**Figure 1:** (+)-Phendimetrazine (PDM) effects on (+)-phenmetrazine (PM) -induced inward currents at hDAT in *Xenopus laevis* oocytes voltage-clamped to  $-60$  mV. The initial DA-induced response was  $5 \mu\text{M}$  DA. This representative trace shows application of  $200 \mu\text{M}$  (+)-PDM attenuated the current induced by  $2 \mu\text{M}$  (+)-PM.

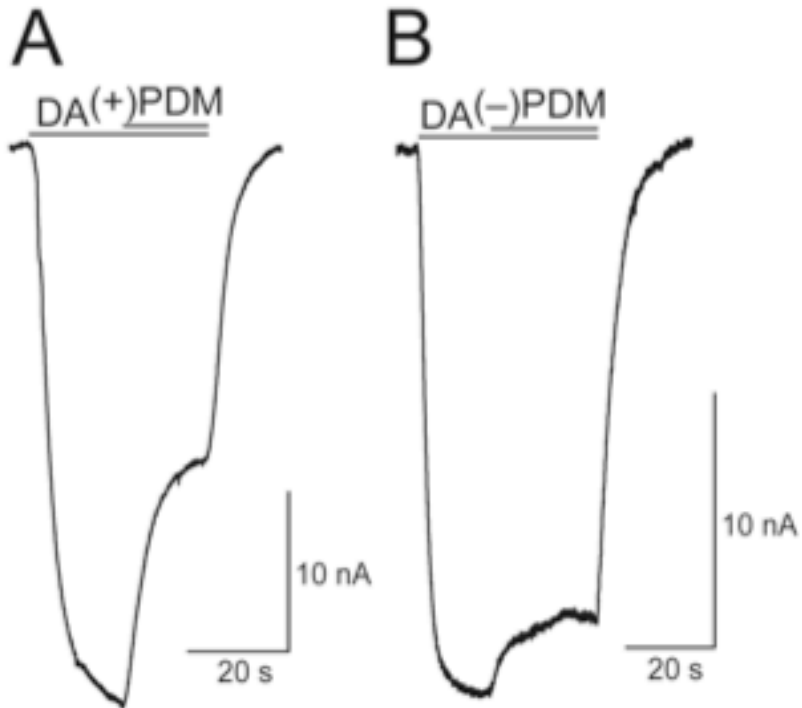

**Figure 2:** (+)-Phendimetrazine (PDM) and (-)-PDM effects on dopamine- (DA) -induced inward currents at hDAT in *Xenopus laevis* oocytes voltage-clamped to  $-60$  mV. Panel A shows application of  $50$   $\mu$ M (+)-PDM attenuated the current induced by  $5$   $\mu$ M DA. Panel B shows application of  $100$   $\mu$ M (-)-PDM attenuated the current induced by  $5$   $\mu$ M DA; however, this effect was weaker than (+)-PDM due to the lower potency of (-)-PDM.

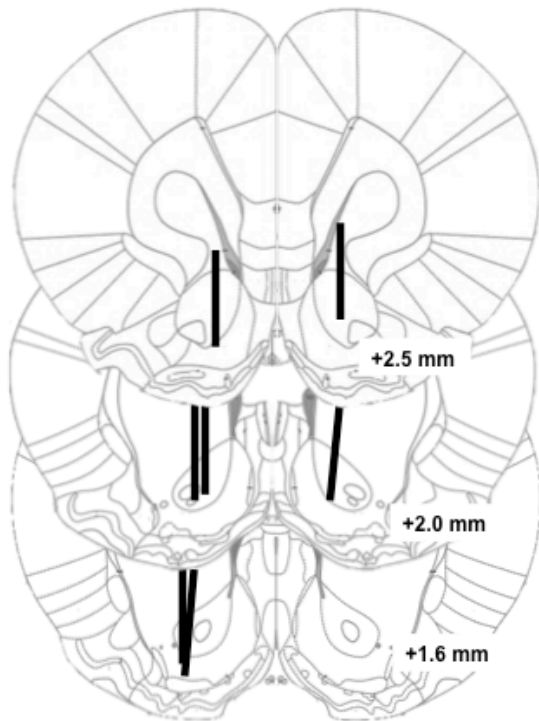

**Figure 3:** Coronal section depiction of the rat brain (adapted by authors from Paxinos and Watson, 2006) showing the positions of the microdialysis probes. Number in the bottom right indicates anterior-posterior position relative to bregma.

Paxinos, G. and Watson, C. *The Rat Brain in Stereotaxic Coordinates*, 6<sup>th</sup> edition, (Academic Press, San Diego 2006).

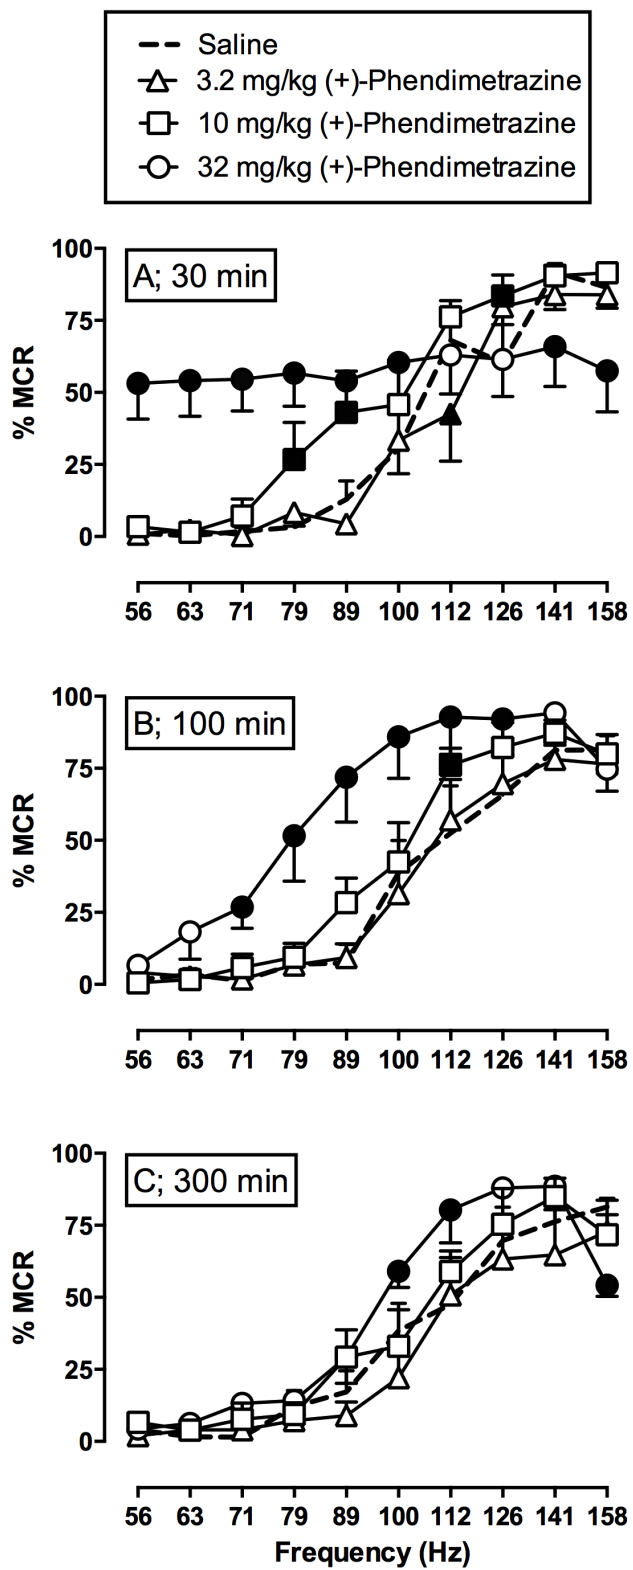

**Figure 4:** (+)-Phendimetrazine (PDM; 3.2-32 mg/kg, ip) effects on intracranial self-stimulation (ICSS) at 30 min (Panel A), 100 min (Panel B), and 300 min (Panel C). *Abscissa:* frequency of electrical brain stimulation in Hz. *Ordinate:* ICSS rate maintained by each brain stimulation frequency, expressed as percent maximum control reinforcement rate (%MCR). Filled points represent frequencies at which ICSS rates were statistically different from vehicle rates ( $p < 0.05$ ). All data show mean  $\pm$  SEM for 6 rats. 30 min (frequency:  $F_{9,45}=49.3$ ,  $p < 0.0001$ ; dose  $\times$  frequency interaction:  $F_{27,135}=8.0$ ,  $p < 0.0001$ ). 100 min (frequency:  $F_{9,45}=51.7$ ,  $p < 0.0001$ ; dose:  $F_{3,15}=4.8$ ,  $p=0.0152$ ; dose  $\times$  frequency interaction:  $F_{27,135}=2.6$ ,  $p=0.0002$ ). 300 min (frequency:  $F_{9,45}=52.5$ ,  $p < 0.0001$ ; dose:  $F_{3,15}=7.1$ ,  $p=0.0034$ ; dose  $\times$  frequency interaction:  $F_{27,135}=1.9$ ,  $p=0.0071$ ).
